# Supplementary material
Source: Springer Nature journal article supplement (https://www.springermedizin.de/resource/supplementary/12890_2009_158_MOESM1_ESM.pdf/9506112)

M 39  
22/01/1968  
11/04/2007  
10:00:57  
CVP: A1/4  
D. F:  
E: 5 G: N

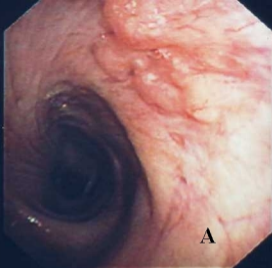

A

M 39  
22/01/1968  
11/04/2007  
10:01:02  
CVP: A2/4  
D. F:  
E: 5 G: N

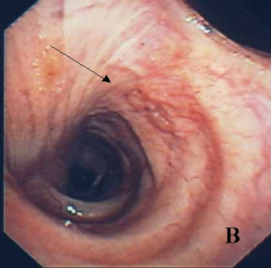

B

M 39  
22/01/1968  
11/04/2007  
10:01:09  
CVP: A3/4  
D. F:  
E: 5 G: N

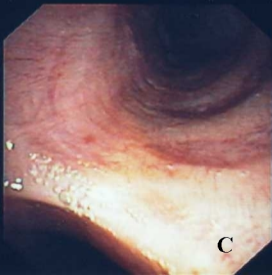

C

M 39  
22/01/1968  
11/04/2007  
10:01:24  
CVP: A4/4  
D. F:  
E: 5 G: N

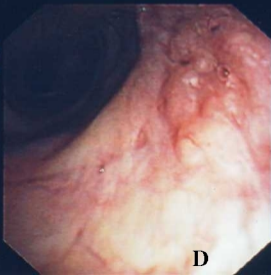

D

Supplement: MOESM1 [file 9506112]
